# Supplementary material for: IFNα Impairs Autophagic Degradation of mtDNA Promoting Autoreactivity of SLE Monocytes in a STING-Dependent Fashion
Source: PubMed Central journal article supplement — Cell Rep. 2018 Oct 23;25(4):921–933.e5. doi: 10.1016/j.celrep.2018.09.001 (PMC6218203; doi:10.1016/j.celrep.2018.09.001), 2018-10-23
Supplement: mmc1.pdf [file mmc1.pdf]

**Supplemental Information**

**IFN $\alpha$  Impairs Autophagic Degradation of mtDNA**

**Promoting Autoreactivity of SLE Monocytes**

**in a STING-Dependent Fashion**

**Katerina Gkirtzimanaki, Eleni Kabrani, Dimitra Nikoleri, Alexander Polyzos, Athanasios Blanas, Prodromos Sidiropoulos, Antonis Makrigiannakis, George Bertsias, Dimitrios T. Boumpas, and Panayotis Verginis**

## Supplemental Figures

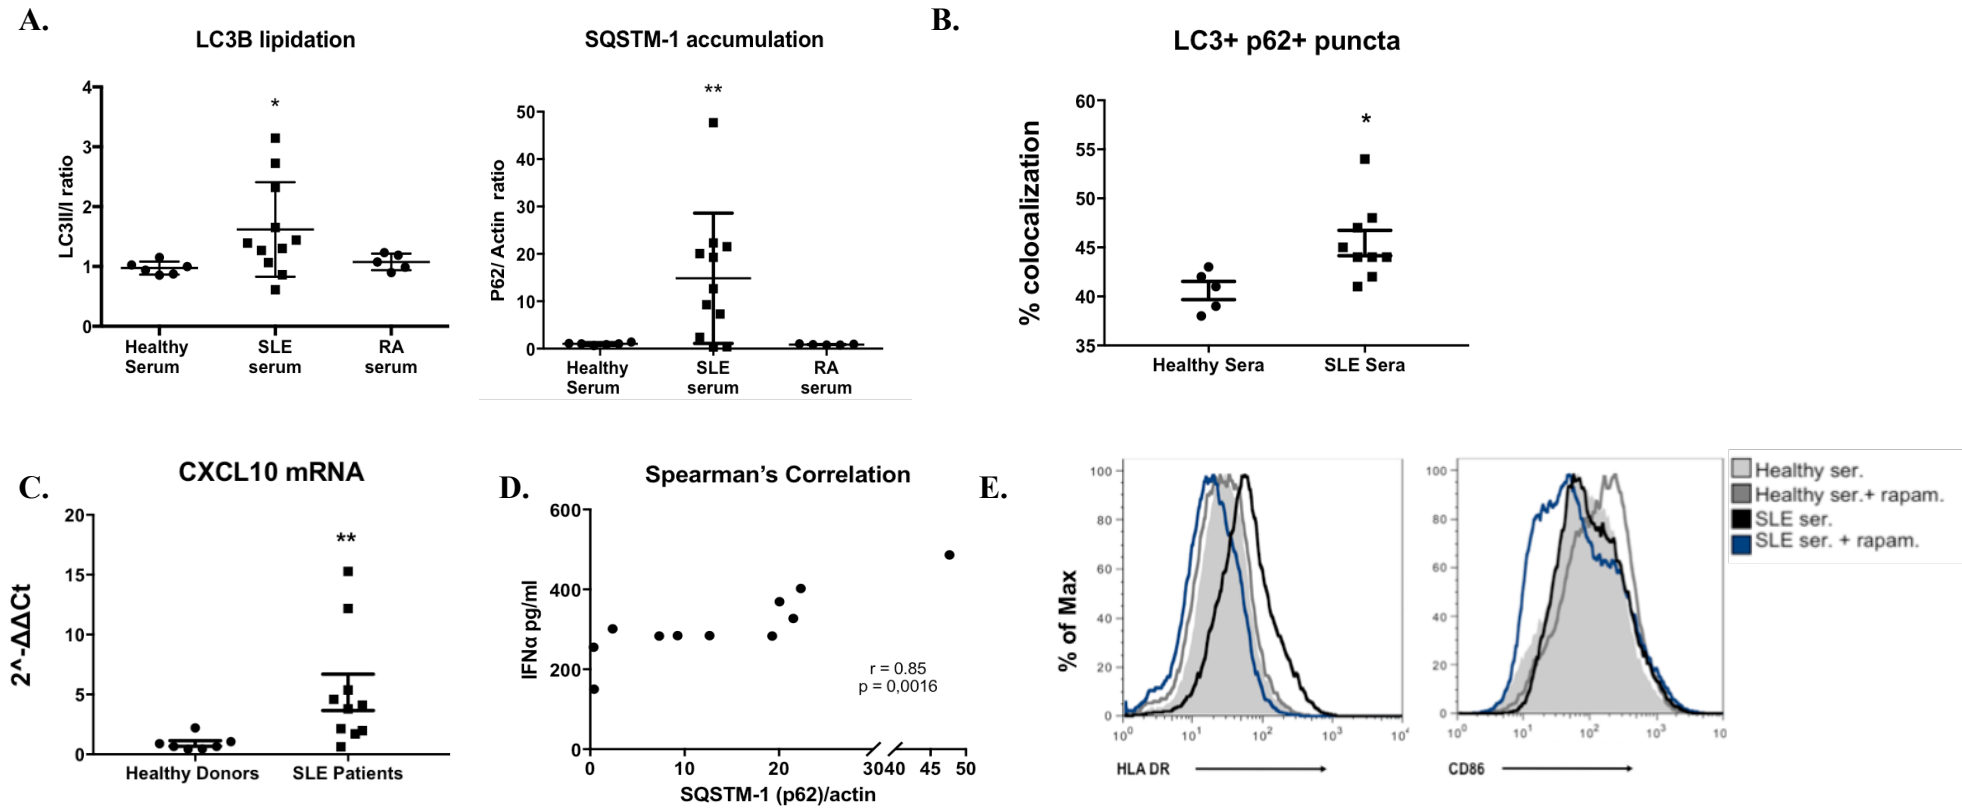

**Figure S1: SLE serum impairs autophagic degradation of healthy monocytes in an [IFN $\alpha$ ]-correlative way that enhances their immunogenicity.** Related to Figures 1B, 2, 3A.

Healthy CD14<sup>+</sup> monocytes were treated with 10% human sera for 24hours as indicated. **(A)** Quantification of W.B. protein band intensity ratios  $N_{HEAL} = 6$ ,  $N_{SLE} = 10$ ,  $N_{RA} = 5$  (numbers of sera), **(B)** Analysis of % colocalization of LC3<sup>555</sup> with P62<sup>488</sup> puncta.  $N_{HEAL} = 5$ ,  $N_{SLE} = 9$ ,  $n = 3$  (number of different healthy donors). **(C)** Relative CXCL10 mRNA levels in CD14<sup>+</sup> PBMCs of the SLE patients whose sera were assayed in (A) and (B). **(D)** Spearman's correlation analysis between SLE sera IFN $\alpha$  concentration as measured by ELISA (pg/ml) and SQSTM-1 (P62)/actin ratio of immunoblot band intensities of the cell lysates. **(E)** Histograms of a representative flow cytometric analysis of HLA DR and CD86 expression on CD14<sup>+</sup> monocytes from a healthy donor treated with allogeneic sera +/- rapamycin (24hrs). Results are expressed as mean + SEM. \* $P < 0.05$ , \*\* $P < 0.005$ . All data sets were analyzed using non parametric Mann Whitney U test.

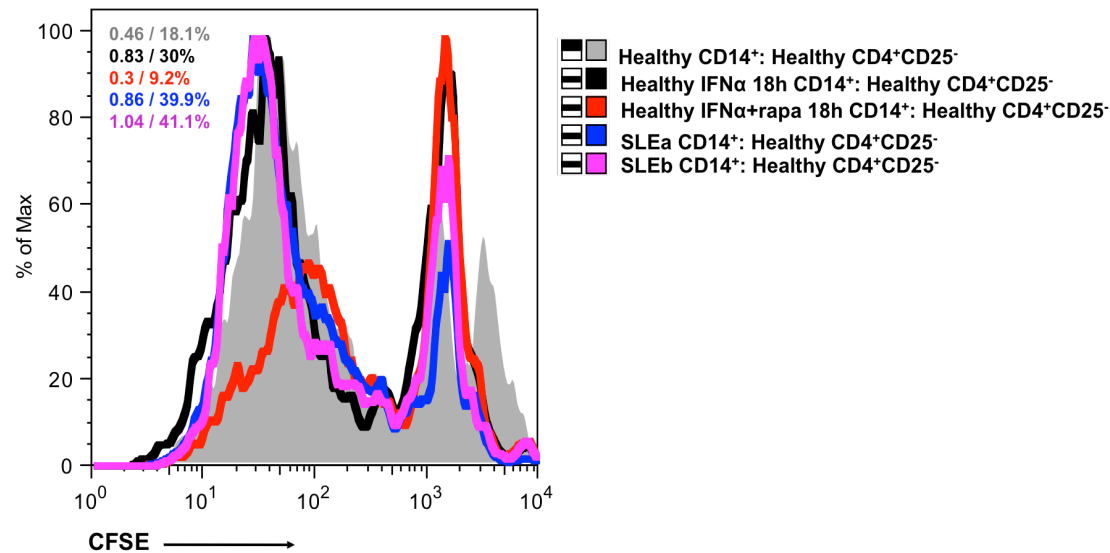

**Figure S2: SLE monocytes exhibit increased ability to induce CD4 T cell proliferation compared to healthy controls.** Related to Figure 3E.

SLE or healthy CD14<sup>+</sup> monocytes were isolated and co-cultured with allogeneic naïve CFSE-labeled CD4<sup>+</sup> T cells (isolated from cord blood as described in Experimental procedures) for 6 days. Proliferation index analysis demonstrated an increased proliferation of T cells in the presence of SLE monocytes compared to healthy controls. Proliferation Index / % Divided cells are listed on the upper left part of the representative result of CFSE dilution presented.

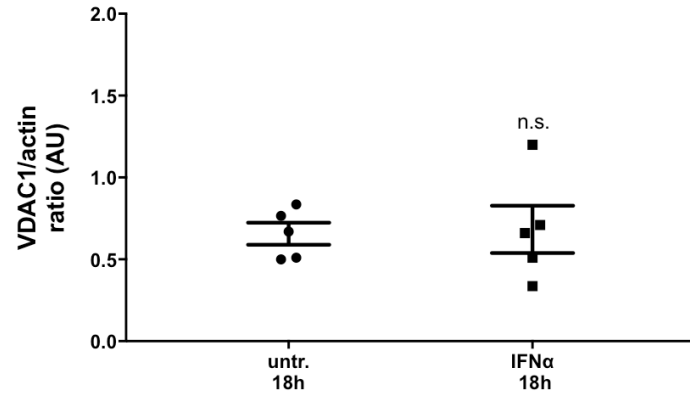

**Figure S3: VDAC1 protein levels remain unchanged upon IFN $\alpha$  mediated effects in lysosomal degradation.** Related to Figure 4E-G.

Quantification of Western Blot protein bands intensity ratios of VDAC1 to actin, from 5 independent experiments ( $N_{HEAL.} = 5$ ). Data are expressed as mean +SEM. *n.s.* indicates absence of statistical significance.

A.

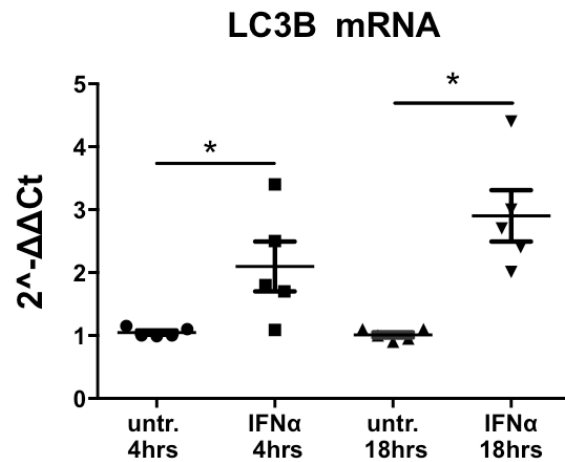

B.

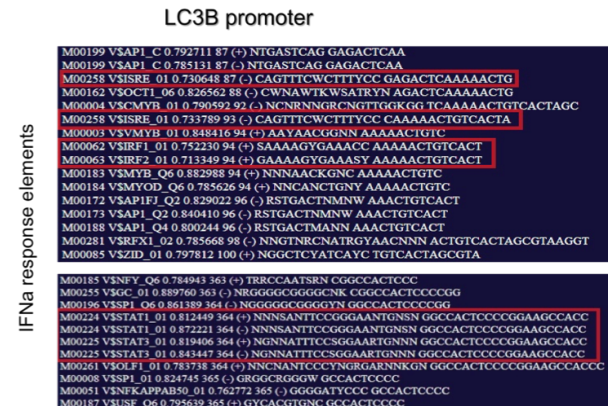

**Figure S4: IFNα upregulates LC3B transcription.** Related to Figure 2D.

(A) Relative mRNA levels of LC3B compared to GAPDH upon IFNα(400ng/ml) treatment of healthy monocytes for 4 and 18hours ( $n = 5$ ). (B) *in silico* analysis (<http://tfbind.hgc.jp/>) of LC3B promoter indicated the presence of stat and irf binding sites. Results are expressed as mean +SEM. \*P < 0.05. Results were analyzed using paired, student's t test.

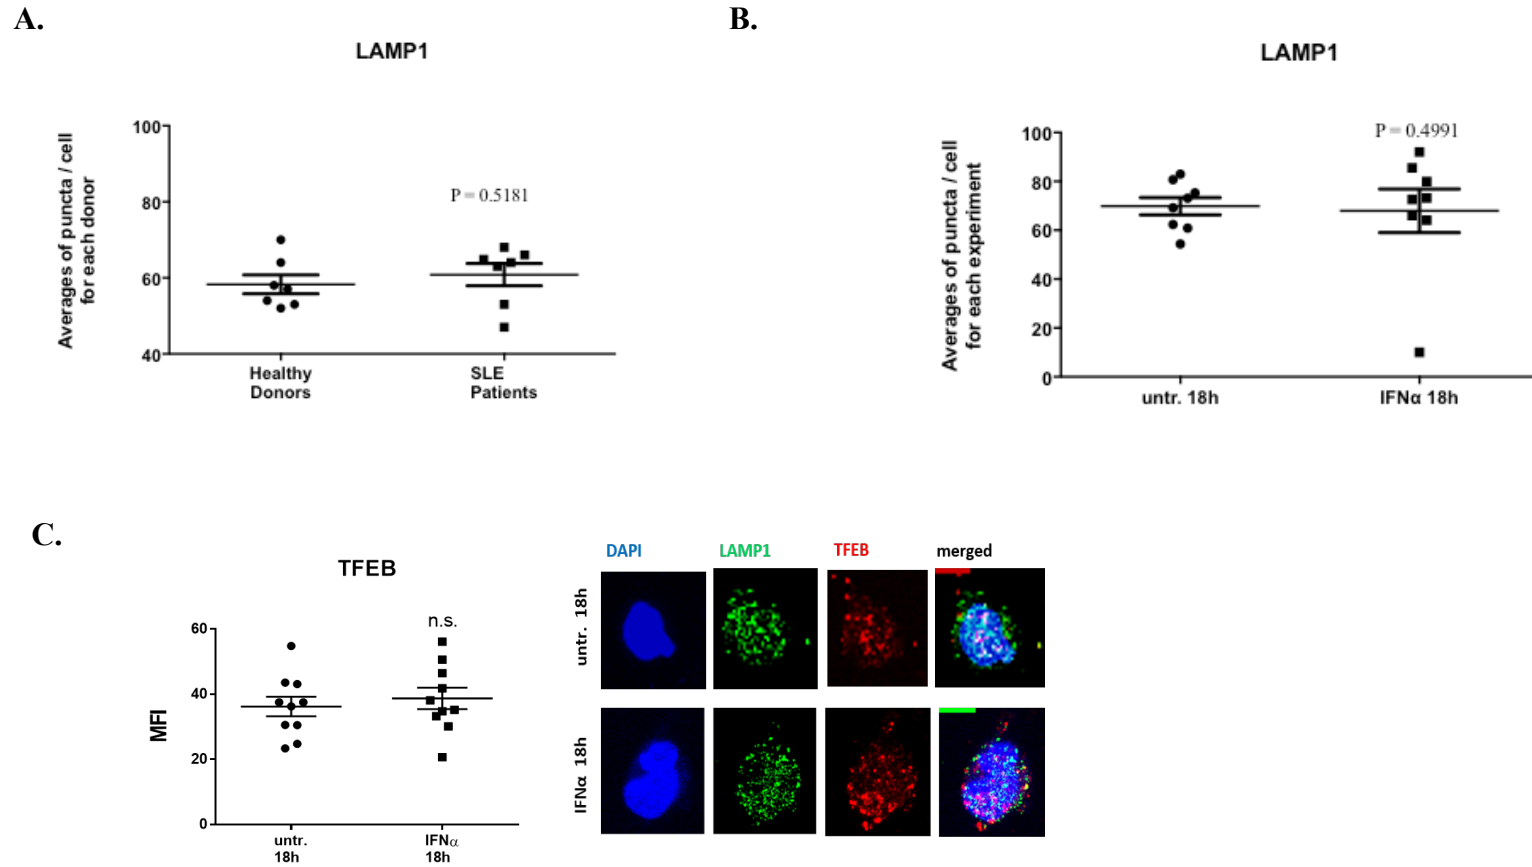

**Figure S5: Lysosomal biogenesis is not affected in SLE and IFN $\alpha$ -treated monocytes.** Related to Figures 1D, 2E.

(A) Averages of 15 measurements of LAMP1+ puncta/cell were calculated for each donor ( $n_{\text{healthy}}=7$ ,  $n_{\text{SLE}}=7$ ) and plotted. (B) same as in (A) for healthy CD14<sup>+</sup> monocytes ( $n_{\text{healthy}}=8$ ) +/- IFN $\alpha$  (400ng/ml) for 18hrs. (C) TFEB expression and localization in healthy CD14<sup>+</sup> monocytes ( $n_{\text{healthy}}=8$ ) +/- IFN $\alpha$  (400ng/ml) for 18hrs. P values were calculated by non parametric Mann Whitney U test for (A) and paired student's t test for (B). Scale bars 5 $\mu$ m.

**A.**

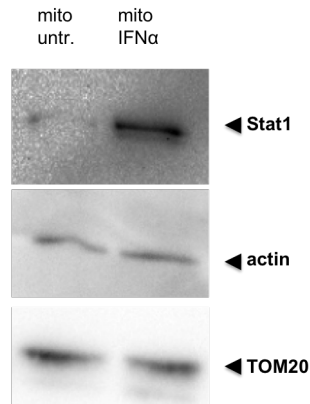

**B.**

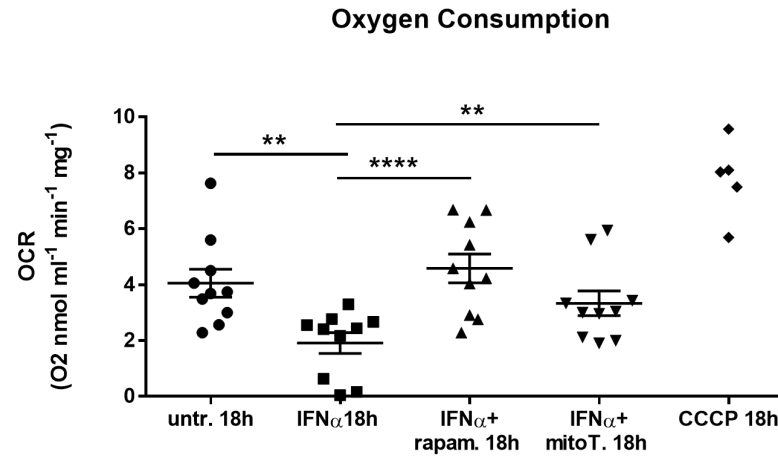

**Figure S6: Stat1 is localized in mitochondria and mitochondrial respiration is deregulated upon IFN $\alpha$  signaling.** Related to Figures 4D, 5.

**(A)** Mitochondrial preparations from healthy CD14<sup>+</sup> monocytes either untreated or treated with IFN $\alpha$  (400ng/ml) for 18hrs (ThermoScientific Mitochondrial Isolation kit, reagent based method) were lysed with RIPA supplemented with protease and phosphatase inhibitors and 80 $\mu$ g of lysates were analysed via 12% SDS-PAGE. Membranes were blotted for Stat1, actin and TOM20 as depicted. **(B)**

Averages of oxygen consumption rates of 4x10<sup>6</sup> CD14<sup>+</sup> monocytes treated as indicated were normalized with the total protein content of each sample. Respiration measurements were recorded and analyzed by Oxygraph Plus Software. CCCP decoupler was used as a strong inducer of oxygen consumption. P values were calculated by paired student's t test.

**Table S2.** RA patients' clinical records. Related to Figures 1 and S1

| Sex/gender | Age | Steroids - dose | Methotrexate (mg) | Biologics            |
|------------|-----|-----------------|-------------------|----------------------|
| Female     | 56  | 0               | 0                 | 0                    |
| Female     | 46  | 160IM           | 0                 | adalinumab (humira ) |
| Female     | 80  | 10              | 15                | enbrel               |
| Female     | 63  | 0               | 12,5              | 0                    |
| Male       | 48  | 0               | 0                 | 0                    |
| Female     | 42  | 0               | 0                 | 0                    |

**Table S4.** MSIGBD Analysis of RNAseq data. Related to Figure 6A

| Gene Set Name [# Genes (K)]                                               | Description                                                                                  | # Genes in Overlap (k) | p-value                | FDR q-value            |
|---------------------------------------------------------------------------|----------------------------------------------------------------------------------------------|------------------------|------------------------|------------------------|
| <a href="#">REACTOME_INTERFERON_ALPHA_BETA_SIGNALING [64]</a>             | Genes involved in Interferon alpha/beta signaling                                            | 20                     | $1.77 \times 10^{-30}$ | $2.35 \times 10^{-27}$ |
| <a href="#">REACTOME_IMMUNE_SYSTEM [933]</a>                              | Genes involved in Immune System                                                              | 42                     | $1.29 \times 10^{-26}$ | $7.06 \times 10^{-24}$ |
| <a href="#">REACTOME_INTERFERON_SIGNALING [159]</a>                       | Genes involved in Interferon Signaling                                                       | 23                     | $2.03 \times 10^{-26}$ | $7.06 \times 10^{-24}$ |
| <a href="#">REACTOME_CYTOKINE_SIGNALING_IN_IMMUNE_SYSTEM [270]</a>        | Genes involved in Cytokine Signaling in Immune system                                        | 27                     | $2.12 \times 10^{-26}$ | $7.06 \times 10^{-24}$ |
| <a href="#">KEGG_HEMATOPOIETIC_CELL_LINEAGE [88]</a>                      | Hematopoietic cell lineage                                                                   | 11                     | $1.47 \times 10^{-12}$ | $3.91 \times 10^{-10}$ |
| <a href="#">NABA_MATRISOME [1028]</a>                                     | Ensemble of genes encoding extracellular matrix and extracellular matrix-associated proteins | 27                     | $8.76 \times 10^{-12}$ | $1.94 \times 10^{-9}$  |
| <a href="#">KEGG_CYTOKINE_CYTOKINE_RECEPTOR_INTERACTION [267]</a>         | Cytokine-cytokine receptor interaction                                                       | 15                     | $1.6 \times 10^{-11}$  | $3.04 \times 10^{-9}$  |
| <a href="#">REACTOME_ANTIVIRAL_MECHANISM_BY_IFN_STIMULATED_GENES [66]</a> | Genes involved in Antiviral mechanism by IFN-stimulated genes                                | 9                      | $7.37 \times 10^{-11}$ | $1.22 \times 10^{-8}$  |
| <a href="#">BIOCARTA_IL17_PATHWAY [17]</a>                                | IL 17 Signaling Pathway                                                                      | 6                      | $2.3 \times 10^{-10}$  | $3.4 \times 10^{-8}$   |
| <a href="#">NABA_SECRETED_FACTORS [344]</a>                               | Genes encoding secreted soluble factors                                                      | 15                     | $5.49 \times 10^{-10}$ | $7.3 \times 10^{-8}$   |
